# Supplementary material for: Synthesis of (Ag,F)-modified anatase TiO2 nanosheets and their enhanced photocatalytic activity
Source: Royal Society of Chemistry journal article supplement (doi:10.1039/c5nj02544c), 2015-12-16
Supplement: c5nj02544c1.pdf [file c5nj02544c1.pdf]

**Published in New Journal of Chemistry**

**Synthesis of (Ag, F)-Modified Anatase TiO<sub>2</sub> Nanosheets and  
Their Enhanced Photocatalytic Activity**

*Yidan Luo<sup>a</sup>, Shuohan Yu<sup>a</sup>, Bin Li<sup>a,\*</sup>, Lihui Dong<sup>a,\*</sup>, Fan Wang<sup>a</sup>, Minguang Fan<sup>a</sup>, and  
Feiyue Zhang<sup>a</sup>*

<sup>a</sup>Guangxi Key Laboratory Petrochemical Resource Processing and Process  
Intensification Technology, School of Chemistry and Chemical Engineering, Guangxi  
University, Nanning, Guangxi 530004, China

## Supporting Information.

XRF results of the major element content, Energy band gaps of catalysts, UV light photocatalysis degradation rates contents, visible light photocatalysis degradation rates contents, extra TEM images, EPR spectra.

**Table S1.** XRF results of the major element content of photocatalysts.

| Sample | Composition (at%) |       |      |      |
|--------|-------------------|-------|------|------|
|        | Ti                | O     | F    | Ag   |
| TS1F10 | 30.28             | 60.6  | 9.05 | 0.07 |
| TS2F00 | 33.3              | 66.64 | 0    | 0.06 |
| TS2F06 | 31.11             | 62.25 | 6.57 | 0.06 |
| TS2F10 | 30.34             | 60.72 | 8.87 | 0.07 |
| TS4F10 | 30.5              | 61.08 | 8.24 | 0.18 |

**Table S2.** Energy Band Gaps of the Samples.

| Samples | Eg1(eV) | Eg2(eV) |
|---------|---------|---------|
| TS0F10  | 3.18    | -       |
| TS1F10  | 3.15    | 2.12    |
| TS2F10  | 3.12    | 2.12    |
| TS3F10  | 3.11    | 2.13    |
| TS4F10  | 3.11    | 2.11    |
| TS2F00  | 3.19    | 1.90    |
| TS2F02  | 3.18    | 1.98    |
| TS2F04  | 3.18    | 2.04    |
| TS2F06  | 3.15    | 2.09    |
| TS2F08  | 3.14    | 2.11    |
| TS2F12  | 3.12    | 2.13    |

**Table S3.** UV Light Photocatalysis Degradation Rates Contents for TiO<sub>2</sub> Nanosheets and the Mean Square Errors.

| Samples | Degradation rate content (min <sup>-1</sup> ) | R2      |
|---------|-----------------------------------------------|---------|
| blank   | 0.00322                                       | 0.99941 |
| TS0F10  | 0.01149                                       | 0.99932 |
| TS1F10  | 0.01893                                       | 0.99298 |
| TS2F10  | 0.03298                                       | 0.99891 |
| TS3F10  | 0.02450                                       | 0.99780 |
| TS4F10  | 0.01434                                       | 0.99509 |
| TS2F00  | 0.00391                                       | 0.99736 |
| TS2F02  | 0.00721                                       | 0.99785 |
| TS2F04  | 0.00905                                       | 0.99987 |
| TS2F06  | 0.01375                                       | 0.99788 |
| TS2F08  | 0.02014                                       | 0.99698 |
| TS2F12  | 0.03569                                       | 0.99844 |

**Table S4.** Visible Light Photocatalysis Degradation Rates Contents for TiO<sub>2</sub> Nanosheets and the Mean Square Errors.

| Samples | Degradation rate content (min <sup>-1</sup> ) | R2      |
|---------|-----------------------------------------------|---------|
| blank   | 0.00112                                       | 0.98963 |
| TS0F10  | 0.00205                                       | 0.99966 |
| TS1F10  | 0.00471                                       | 0.99630 |
| TS2F10  | 0.01082                                       | 0.99168 |
| TS3F10  | 0.00717                                       | 0.99789 |
| TS4F10  | 0.00365                                       | 0.99467 |
| TS2F00  | 0.00349                                       | 0.99884 |
| TS2F02  | 0.00407                                       | 0.99622 |
| TS2F04  | 0.00498                                       | 0.98795 |
| TS2F06  | 0.00559                                       | 0.99790 |
| TS2F08  | 0.00902                                       | 0.99991 |
| TS2F12  | 0.01184                                       | 0.99481 |

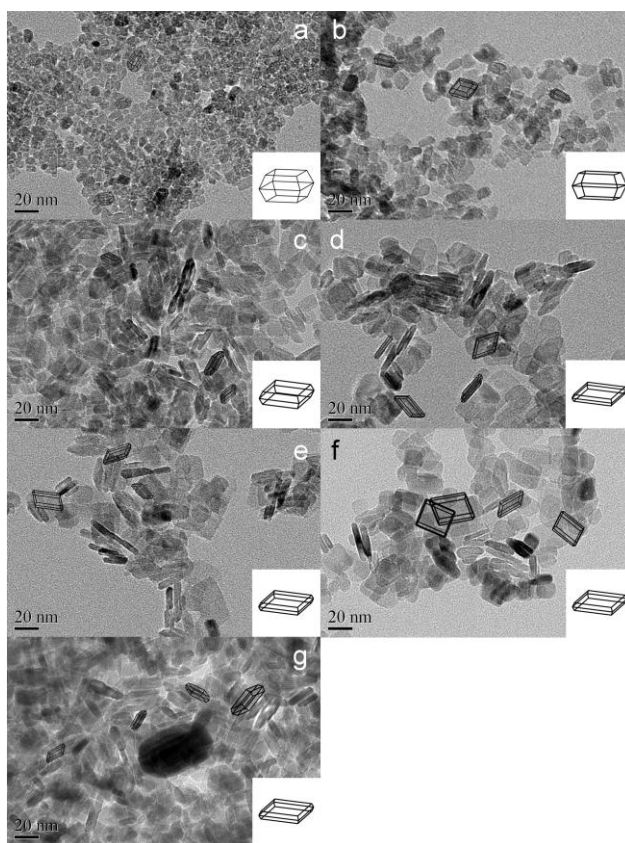

**Figure S1.** TEM image of TiO<sub>2</sub> nanosheets: (a) TS2F02, (b) TS2F04, (c) TS2F08, (d) TS2F12, (e) TS0F10, (f) TS1F10, and (g) TS4F10.

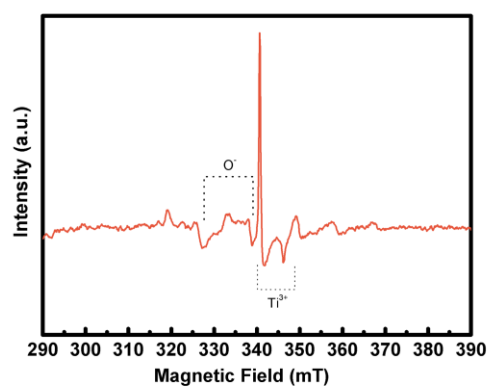

**Figure S2.** EPR spectra of TS2F10.
